# Supplementary material for: Sustainable production of rare oleanane-type ginsenoside Ro with an artificial glycosylation pathway in Saccharomyces cerevisiae
Source: Royal Society of Chemistry journal article supplement (doi:10.1039/d2gc02639b), 2022-01-01
Supplement: d2gc02639b1.pdf [file d2gc02639b1.pdf]

## Electronic Supplementary Information (ESI)

Sustainable production of rare oleanane-type ginsenoside Ro with an  
artificial glycosylation pathway in *Saccharomyces cerevisiae*

Shichao Ren<sup>1</sup>, Qiuyan Sun<sup>1</sup>, Liang Zhang<sup>1</sup>, Wentao Sun<sup>1</sup>, Yongxing Li<sup>1</sup>, Xudong  
Feng<sup>1\*</sup>, and Chun Li<sup>1,2\*</sup>

<sup>1</sup>Key Laboratory of Medical Molecule Science and Pharmaceutical Engineering,  
Ministry of Industry and Information Technology, Institute of Biochemical Engineering,  
School of Chemistry and Chemical Engineering, Beijing Institute of Technology,  
Beijing, 100081, China

<sup>2</sup>Key Lab for Industrial Biocatalysis, Ministry of Education, Department of Chemical  
Engineering, Tsinghua University, Beijing 100084, China

\*Corresponding author: Xudong Feng (xd.feng@bit.edu.cn)

Chun Li (lichun@mail.tsinghua.edu.cn)

Table S1 Strains and plasmids used in this study

| Strains and [Plasmids]       | Description                                                                                  | Sources               |
|------------------------------|----------------------------------------------------------------------------------------------|-----------------------|
| <i>S. cerevisiae</i><br>SynV | Derived from BY4741 with artificial chromosome V                                             | (Xie et al., 2017)    |
| OA01                         | <i>S. cerevisiae</i> SynV::HO::FBA1p-bAS-PGII1t-TDH2p-MtCPR-ADH1t-TEF1p-CYP716A12-CYC1t- HIS | This study            |
| OA02                         | OA01::NTS::TPI1p-tHMG1-TPI1t- PYK1p-ERG1-PYK1t-LEU                                           | This study            |
| OA03                         | OA01::NTS::TPI1p-tHMG1-TPI1t-PGII1p-ERG9-PGII1t-PYK1p-ERG1-PYK1t-LEU                         | This study            |
| CE01                         | OA03::Gal80:: kanMX-ADH1t-HsUGDH-HXT7p-TEF1p-OAGT-CYC1t                                      | This study            |
| CE02                         | OA03::Gal80:: kanMX-ADH1t-HsUGDH-HXT7p-TEF1p-OAGT1-CYC1t                                     | This study            |
| CE03                         | OA03::Gal80:: kanMX-ADH1t-HsUGDH-HXT7p-TEF1p-GuCsl-CYC1t                                     | This study            |
| CE04                         | OA03::Gal80:: kanMX-ADH1t-HsUGDH-HXT7p-TEF1p-GmCsl1-CYC1t                                    | This study            |
| CE05                         | OA03::Gal80:: kanMX-ADH1t-HsUGDH-HXT7p-TEF1p-GmCsl3-CYC1t                                    | This study            |
| CE06                         | OA03::Gal80:: kanMX-ADH1t-HsUGDH-HXT7p-TEF1p-Pn007110-CYC1t                                  | This study            |
| CE07                         | OA03::Gal80:: kanMX-ADH1t-HsUGDH-HXT7p-TEF1p-Pn007111-CYC1t                                  | This study            |
| CE08                         | OA03::Gal80:: kanMX-ADH1t-HsUGDH-HXT7p-TEF1p-Pn016322-CYC1t                                  | This study            |
| CE09                         | OA03::Gal80:: kanMX-ADH1t-HsUGDH-HXT7p-TEF1p-Pn022859-CYC1t                                  | This study            |
| CE10                         | OA03::Gal80:: kanMX-ADH1t-AtUGDH-HXT7p-TEF1p-GmCsl3-CYC1t                                    | This study            |
| CE14                         | OA03::Gal80:: kanMX-ADH1t-AtUGDH-HXT7p-TEF1p-Pn022859-CYC1t                                  | This study            |
| [pET-28a]                    | Kana resistance, used in prokaryote                                                          | Stored in lab         |
| [pET-28a-11]                 | [pET-28a] with T7-UGT73C11-T7t cassette                                                      | Stored in lab         |
| [pET-28a-33]                 | [pET-28a] with T7-UGT73C33-T7t cassette                                                      | Stored in lab         |
| [pET-28a-24]                 | [pET-28a] with T7-UGT73F24-T7t cassette                                                      | Stored in lab         |
| <i>E. coli</i><br>BL21(DE3)  | <i>F-ompT hsdS(rB-mB-) gal dcm</i> (DE3)                                                     | Purchased from Biomed |
| DE3-11                       | <i>E. coli</i> BL21(DE3) with [pET-28a-11]                                                   | Stored in lab         |
| DE3-33                       | <i>E. coli</i> BL21(DE3) with [pET-28a-33]                                                   | Stored in lab         |
| DE3-24                       | <i>E. coli</i> BL21(DE3) with [pET-28a-24]                                                   | Stored in lab         |
| [pET-28a-Gm2]                | [pET-28a] with T7-GmsGT2-T7t cassette                                                        | This study            |

|               |                                                                                                            |            |
|---------------|------------------------------------------------------------------------------------------------------------|------------|
| [pET-28a-F3]  | [pET-28a] with <i>T7-UGT73F3-T7t</i> cassette                                                              | This study |
| [pET-28a-40]  | [pET-28a] with <i>T7-UGT73P40-T7t</i> cassette                                                             | This study |
| [pET-28a-171] | [pET-28a] with <i>T7-17171-T7t</i> cassette                                                                | This study |
| [pET-28a-177] | [pET-28a] with <i>T7-17177-T7t</i> cassette                                                                | This study |
| [pET-28a-225] | [pET-28a] with <i>T7-023225-T7t</i> cassette                                                               | This study |
| [pET-28a-560] | [pET-28a] with <i>T7-027352560-T7t</i> cassette                                                            | This study |
| [pET-28a-971] | [pET-28a] with <i>T7-020234971-T7t</i> cassette                                                            | This study |
| [pET-28a-023] | [pET-28a] with <i>T7-15023-T7t</i> cassette                                                                | This study |
| [pET-28a-440] | [pET-28a] with <i>T7-003623440-T7t</i> cassette                                                            | This study |
| [pET-28a-389] | [pET-28a] with <i>T7-98389-T7t</i> cassette                                                                | This study |
| DE3-Gm2       | <i>E. coli</i> BL21(DE3) with [pET-28a-Gm2]                                                                | This study |
| DE3-F3        | <i>E. coli</i> BL21(DE3) with [pET-28a-F3]                                                                 | This study |
| DE3-40        | <i>E. coli</i> BL21(DE3) with [pET-28a-40]                                                                 | This study |
| DE3-171       | <i>E. coli</i> BL21(DE3) with [pET-28a-171]                                                                | This study |
| DE3-177       | <i>E. coli</i> BL21(DE3) with [pET-28a-177]                                                                | This study |
| DE3-225       | <i>E. coli</i> BL21(DE3) with [pET-28a-225]                                                                | This study |
| DE3-560       | <i>E. coli</i> BL21(DE3) with [pET-28a-560]                                                                | This study |
| DE3-971       | <i>E. coli</i> BL21(DE3) with [pET-28a-971]                                                                | This study |
| DE3-023       | <i>E. coli</i> BL21(DE3) with [pET-28a-023]                                                                | This study |
| DE3-440       | <i>E. coli</i> BL21(DE3) with [pET-28a-440]                                                                | This study |
| DE3-389       | <i>E. coli</i> BL21(DE3) with [pET-28a-389]                                                                | This study |
| R101          | CE14:: <i>YPRC<math>\tau</math>3</i> :: <i>TEF1p-UGT73P40-CYC1t-URA3</i>                                   | This study |
| IVA01         | CE14:: <i>YPRC<math>\tau</math>3</i> :: <i>HXT7p-UGT73F3-ADH1t-URA3</i>                                    | This study |
| Ro01          | CE14:: <i>YPRC<math>\tau</math>3</i> :: <i>CYC1t-UGT73P40-Gal1/10-UGT73F3-ADH1t-URA3</i>                   | This study |
| Ro02          | CE14:: <i>YPRC<math>\tau</math>3</i> :: <i>CYC1t-PjmUGT1-Gal1/10-PjmUGT2-ADH1t-URA3</i>                    | This study |
| Ro03          | CE14:: <i>YPRC<math>\tau</math>3</i> :: <i>HXT7p-UGT73P40-Linker-UGT73F3 -ADH1t-URA3</i>                   | This study |
| Ro04          | CE14:: <i>YPRC<math>\tau</math>3</i> :: <i>TEF1p-UGT73F3-Linker-UGT73P40 -ADH1t-URA3</i>                   | This study |
| Ro05          | Ro01:: <i>YORW<math>\Delta</math>22</i> :: <i>TEF1p-BleoR-CYC1t-Gal1/10p-Pn022859-PGII t</i>               | This study |
| Ro06          | Ro01:: <i>YORW<math>\Delta</math>22</i> :: <i>TEF1p-BleoR-CYC1t-ADH1t-AtUGDH-Gal1/10p-Pn022859-PGII t</i>  | This study |
| Ro07          | Ro01:: <i>YORW<math>\Delta</math>22</i> :: <i>TEF1p-BleoR-CYC1t-ADH1t-Pn022859-Gal1/10p-UGT73F3-PGII t</i> | This study |
| Ro08          | Ro01:: <i>YORW<math>\Delta</math>22</i> :: <i>TEF1p-BleoR-CYC1t-ADH1t-AtUGDH-Gal1/10p</i>                  | This study |
| Ro09          | Ro01:: <i>YORW<math>\Delta</math>22</i> :: <i>TEF1p-BleoR-CYC1t-ADH1t-UGT73F3-Gal1/10p-AtUGDH-PGII t</i>   | This study |
| Ro10          | Ro05:: <i>YHRC<math>\Delta</math>14</i> :: <i>MET17p-MET17-MET17t-Gal2p-Pn022859-PGII t</i>                | This study |

Table S2 Primers used in this study

| Names     | From 5'-3'                                                      | Usage          |
|-----------|-----------------------------------------------------------------|----------------|
| P1A-F     | TGAATTCGAGAATTATCCTGGGCACGAGTGAAAC                              | GgbAS cassette |
| P1A-R     | CAGTATTGTTATACGCCATTTTAAGTCCAAAGGCA<br>CAAT                     | GgbAS cassette |
| P1B-F     | TAAAATGGCGTATAACAATACTGACAGTACTAAAT<br>AATTGCCTACTTGG           | GgbAS cassette |
| P1B-Rx    | GAGCGATTTGTTTAAGTCAAACAAACTGGAGTAG<br>ATGGCAATG                 | GgbAS cassette |
| P1D-F     | CACTAAACTACATTGGTTTTTCCAGTGAATGATTA<br>TTTGTCG                  | GgbAS cassette |
| P1D-R     | TGCATGCCTGCAGGCAGGTCTGCGATCACTGG                                | GgbAS cassette |
| P1PGI1t-F | TTTGACTTAAACAAATCGCTCTTAAATATATACCTA<br>AAGAACATTAAAGCT         | GgbAS cassette |
| P1PGI1t-R | GGAAAAACCAATGTAGTTTAGTGTTTTTCTTCCA<br>GTGCGAG                   | GgbAS cassette |
| VP1-NF    | TATCCTGGGCACGAGTGAAACAAAG                                       | GgbAS cassette |
| VP1-R     | CAGGTCTGCGATCACTGGGTAC                                          | GgbAS cassette |
| P2A-F     | GTGAATTCGAGGTTAATTCAAATTAATTGATATAG<br>TTTTTTAATGAGTATTGAATCTGT | MtCPR cassette |
| P2A-R     | GAAAAACCAATGCTATCAAAAACGATAGATCGAT<br>TAGGATGACT                | MtCPR cassette |
| VP2-F     | CATTGGTTTTTCCAGTGAATGATTATTTGTCGTTAC<br>C                       | MtCPR cassette |
| P2B-F     | TTTTTGATAGCATTGGTTTTTCCAGTGAATGATTAT<br>TTGTCGT                 | MtCPR cassette |
| P2B-R     | AGAAGATGTCATTTTGTTTTGTTTGTGTGTGAT<br>GAATTTAATTTGAACTAAG        | MtCPR cassette |
| P2C-F     | AACAAAACAAAATGACATCTTCTAATTCAGACTT<br>GGTTAGAACA                | MtCPR cassette |
| P2C-R     | TCGCGGTCGAGCGACCTCATGCTATACCT                                   | MtCPR cassette |
| P2D-F     | GTCGCTCGACCGCGAATCCTTACATCAC                                    | MtCPR cassette |
| VP2-R     | TTTGTAAATAAAACCTTAGATTAGATTGCTATGCTTT<br>CTTTCTAATGAGC          | MtCPR cassette |
| P2D-R     | TGCCTGCAGTTTGTAATTA AAACTTAGATTAGATT<br>GCTATGCTTTCTTTCTAATG    | MtCPR cassette |
| P3A-F     | TGAATTCGAGGCTCTTAATTAACAATTCTTCGCCA<br>GAGG                     | CYPs cassette  |
| VP3-F     | CTTCGCCAGAGGTTTGGTCAAGTC                                        | CYPs cassette  |
| P3A-R     | TCGCGGTCGAGCGACCTCATGCTATACCT                                   | CYPs cassette  |
| P3B-F     | GTCGCTCGACCGCGAATCCTTACATCAC                                    | CYPs cassette  |
| CYP-F     | TAGCATGAGGTCGCTCCACACACCATAGCTTC                                | CYPs cassette  |
| P3B-R     | ATTTGGCTCCATTTTGTAAATTA AAACTTAGATTAG<br>ATTGCTATGCTTTCTTT      | CYPs cassette  |

|        |                                                                    |                |
|--------|--------------------------------------------------------------------|----------------|
| P3C-F  | TTAATTACAAAATGGAGCCAAATTTCTACTTGTCT<br>TTATTGT                     | CYPs cassette  |
| CYP-R  | TATAGAGTGTACTAGCTTCGAGCGTCCCAAACC<br>TTCTCAAG                      | CYPs cassette  |
| P3C-R  | GTGTACTAGCTTCGAGCGTCC                                              | CYPs cassette  |
| P3D-F  | GCTCGAAGCTAGTACACTCTATATTTTTTTATGCCT<br>CGGTAATG                   | CYPs cassette  |
| VP3-R  | GACGTTAATCACTTGCGATTGTGTGG                                         | CYPs cassette  |
| P3D-R  | GCCTGCAGCTTGCCAGAGCATGTATCA                                        | CYPs cassette  |
| P4B-R  | TCCCCAGCTGATGCGGATTTTCTCCTTACGC                                    | HIS marker     |
| P4A-F  | GAATTCGAGGCTTGGTACCGCGGCTAGCT                                      | HIS marker     |
| VP4-F  | GAGTTAGACAACCTGAAGTCTAGGTCCC                                       | HIS marker     |
| P4A-R  | GTGTACTAGCTTCGAGCGTCC                                              | HIS marker     |
| P4B-F  | GCTCGAAGCTAGTACACTCTATATTTTTTTATGCCT<br>CGGTAATG                   | HIS marker     |
| P4C-F  | GCATCAGCTGGGGGAACAACCTTCACAGAATGT                                  | HIS marker     |
| VP4-R  | CTTGCAATTTATACAGTGATGACCGCTG                                       | HIS marker     |
| VP4-NR | CTGTAAGATTCCGCCACATTTTATACACTCT                                    | HIS marker     |
| P4C-R  | GCCTGCAGACTGTAAGATTCGCCACATTTTATAC<br>AC                           | HIS marker     |
| P5A-F  | GTGAATTCGAGGATAGTTTAAACGGAAACGCAGGT<br>GATATG                      | tHMG1 cassette |
| VP5-F  | CAGACATGTTTCAGTAGGTGGGAGTG                                         | tHMG1 cassette |
| P5A-R  | TTCTAGATATAGAAGTACCTCCCAACTACTTTTC<br>C                            | tHMG1 cassette |
| P5B-F  | GGAGGTACTTCTATATCTAGGAACCCATCAG                                    | tHMG1 cassette |
| P5B-R  | CAATTGGTCCATTTTTAGTTTATGTATGTGTTTTTT<br>GTAGT                      | tHMG1 cassette |
| P5C-F  | CATAAACTAAAAATGGACCAATTGGTGAAAACCTG<br>AAG                         | tHMG1 cassette |
| P5C-R  | AATTATATTAATCTTAGGATTTAATGCAGGTGACG<br>GACC                        | tHMG1 cassette |
| P5D-F  | ATTAAATCCTAAGATTAATATAATTATATAAAAATAT<br>TATCTTCTTTTCTTTATATCTAGTG | tHMG1 cassette |
| VP5-R  | CATCTTCTCAACGCGAAAATGACGC                                          | tHMG1 cassette |
| P5D-R  | ATGCCTGCAGTATATAACAGTTGAAATTTGGATAA<br>GAACATCTTCTCAACGC           | tHMG1 cassette |
| P6A-F  | AGTGAATTCGAGGATTAATATAATTATATAAAAATA<br>TTATCTTCTTTTCTTTATATCTAGTG | ERG9 cassette  |
| VP6-F  | CGTGAATGTTCTTGTAAGGGACGG                                           | ERG9 cassette  |
| P6A-R  | TGATTTTTGTACTATATAACAGTTGAAATTTGGAT<br>AAGAACATCTTCTCAACGC         | ERG9 cassette  |
| P6B-F  | AACTGTTATATAGTAACAAAATCACGATCTGGGT<br>GGG                          | ERG9 cassette  |

|             |                                                                  |                           |
|-------------|------------------------------------------------------------------|---------------------------|
| P6-NV-R     | GCTTTCCCATTTTTAGGCTGGTATCTTGATTCTAAA<br>TCG                      | ERG9 cassette             |
| P6-9-F      | CCAGCCTAAAAATGGGAAAGCTATTACAATTGGC                               | ERG9 cassette             |
| P6-9-R      | CGATTTGTTACGCTCTGTGTAAAGTGATATATA<br>ATAAAACCCAAG                | ERG9 cassette             |
| P6-NV-F     | CACAGAGCGTGAACAAATCGCTCTTAAATATATAC<br>CTAAAGAAC                 | ERG9 cassette             |
| VP6-R       | GAGTTATGTCCTTCGCGCACTGATTC                                       | ERG9 cassette             |
| P6D-R       | TGCCTGCAGGTAGTTTAGTGTTTTTCTTCCAGTGC<br>GAG                       | ERG9 cassette             |
| P7A-F       | GAATTCGAGACAAATCGCTCTTAAATATATACCTA<br>AAGAACATTAAAGC            | ERG1 cassette             |
| VP7-F       | GAACATTAAAGCTATATTATAAGCAAAGATACGTA<br>AATTTTGC                  | ERG1 cassette             |
| P7A-R       | CGACGATCCAGTTTAGTGTTTTTCTTCCAGTGCG                               | ERG1 cassette             |
| P7B-F       | CACTAAACTGGATCGTGGTGTGATACGG                                     | ERG1 cassette             |
| P7B-Rx      | CGTTAACAGCAGACATTGTGATGATGTTTTATTTG<br>TTTTGATTGGTGTCTTG         | ERG1 cassette             |
| P7C-F       | CATCATACAATGTCTGCTGTTAACGTTGCACCTG                               | ERG1 cassette             |
| P7C-Rx      | CATGATTCTTTTTTAAACCAATCAACTCACCAAAC<br>AAAAATGG                  | ERG1 cassette             |
| P7D-Fx      | GTTGATTGGTTAAAAAAGAATCATGATTGAATG<br>AAGATATTATTTTTTGAATTATATTTT | ERG1 cassette             |
| VP7-R       | CATTTATGTACCCATGTATAACCTTCCAAGTTAGTT<br>C                        | ERG1 cassette             |
| P7D-R       | TGCCTGCAGCATTTATGTACCCATGTATAACCTTC<br>CAAG                      | ERG1 cassette             |
| V8-R        | TGATTCTTTTTCTCGAATTCACTGGCCGTCG                                  | LEU marker                |
| P8A-F       | GTGAATTCGAGAAAAAGAATCATGATTGAATGAA<br>GATATTATTTTTTGAATTATATTTT  | LEU marker                |
| VP8-F       | CTCCCATCGCAAGATAATCTTCCCTC                                       | LEU marker                |
| P8A-R       | TTCCACAGTTCATTTATGTACCCATGTATAACCTT<br>CCAAGTTAGT                | LEU marker                |
| P8B-F       | TACATAAATGAACTGTGGGAATACTCAGGTATCGT                              | LEU marker                |
| P8C-F       | CGCGCGACGTTGCAAAGATGGGTTGAAAGAG                                  | LEU marker                |
| VP8-R       | CTGTAGTTAAGCTGGTAAGAGCCTGAC                                      | LEU marker                |
| P8C-R       | GCCTGCAGTTGCGGCCATATCTACCAGAAAGC                                 | LEU marker                |
| K-Gal80-V-R | CAGGTATCCGATACCGAGCTCGAATTCACTG                                  | Csls and UGDH<br>cassette |
| Gal80L-F    | GAGCTCGGTATCGGATACCTGCACAAGC                                     | Csls and UGDH<br>cassette |
| K-Gal80-S-F | GGATACCTGCACAAGCAATTTGGCACCTG                                    | Csls and UGDH<br>cassette |

|                 |                                                       |                        |
|-----------------|-------------------------------------------------------|------------------------|
| G418-F          | CGGCGCACTCTCGATGGTAGACAACC                            | Csls and UGDH cassette |
| G4-UD-GT-R      | CACTAGTATCGATGATCTGAGCGAATTTCTTATGATTTATG             | Csls and UGDH cassette |
| UDGH-R          | CATAAGAAATTCGCTCAGATCATCGATACTAGTGCGGC                | Csls and UGDH cassette |
| UDGH-F          | TTTAATCAAAAAATGTTTCGAGATCAAGAAGATTTGTTGCATTGG         | Csls and UGDH cassette |
| G4-UD-GT-F      | CAACAAATCTTCTTGATCTCGAACATTTTTTTGATTAAAATTAATAAAAAAC  | Csls and UGDH cassette |
| GTs-R           | GCTGCACTCTTCGAGCGTCCC                                 | Csls and UGDH cassette |
| K-Gal80-S-R     | CACTTCATGAACCTGTTGGGAAGCCTTGG                         | Csls and UGDH cassette |
| K-Gal80R-R      | CAAGCTTGCATCACTTCATGAACCTGTTGGGAAG                    | Csls and UGDH cassette |
| K-Gal80-V-F     | GTTTCATGAAGTGATGCAAGCTTGGCGTAATCATG                   | Csls and UGDH cassette |
| G4-AtUD-GT-R    | CCTGCTGTTGCTTAAGCGAATTTCTTATGATTTATG                  | Csls and UGDH cassette |
| AtUGDH-R        | CATAAGAAATTCGCTTAAGCAACAGCAGGCATATC                   | Csls and UGDH cassette |
| G4-AtUD-GT-F    | CCAATACAACAAATTTAACCATGCCGGTTTTTTGATTAAAATTAATAAAAAAC | Csls and UGDH cassette |
| AtUGDH-F        | CAAAAACCGGCATGGTTAAAATTTGTTGTATTGG                    | Csls and UGDH cassette |
| YPRC3L-F        | GCTCGGTAAAAGGAGGTGCACGCATTATGG                        | UGT73F3 cassette       |
| YPL-HXT-R       | CTCATTTCCACGGTTCCAAGGAGGTGAAGAAC                      | UGT73F3 cassette       |
| YPL-HXTF3-F     | CTCCTTGGAACCGTGGAAATGAGGGGTATG                        | UGT73F3 cassette       |
| YP-F3-URA-R     | GATGAATTGAAGAGCGACCTCATGCTATACCTGAGAAAGC              | UGT73F3 cassette       |
| YP-F3-URA-F     | CTCAGGTATAGCATGAGGTCGCTCTTCAATTCATCATTTTTTTTTTATTC    | UGT73F3 cassette       |
| YPRC3R-24-URA-R | GCTGACGTCCCATCCGCGAATTTTAACAAAATATTAAACGTTTAC         | UGT73P40 cassette      |
| URA-YPRC3R-F    | GTAAAATTCGCGGATGGGACGTCAGCACTG                        | UGT73P40 cassette      |
| YPRC3R-R        | CAAGCTTGCATCGGTATTACTCGAGCCCCTAATAC                   | UGT73P40 cassette      |
| YPRC3L-TEF-R    | GAAGCTATGGTGTGTGTTCCAAGGAGGTGAAGAAC                   | UGT73P40 cassette      |

|                    |                                                                  |                                     |
|--------------------|------------------------------------------------------------------|-------------------------------------|
| YPRC3L-24-F        | CCTCCTTGGAACACACACCATAGCTTCAAAATGT<br>TTCTACTC                   | UGT73P40<br>cassette                |
| YPRC3-24-R         | GATGAATTGAACTTCGAGCGTCCCAAACCTTCT<br>C                           | UGT73P40<br>cassette                |
| YPRC3-24-<br>UTA-F | GGTTTTGGGACGCTCGAAGTTCAATTCATCATTTT<br>TTTTTTATTCTTTTTTTTIG      | UGT73P40<br>cassette                |
| F3Gal24-F          | CCTCCTTGGAACTTCGAGCGTCCCAAACC                                    | UGT73F3 and<br>UGT73P40<br>cassette |
| YPL-HXT-R          | CTCATTTCCACGGTTCCAAGGAGGTGAAGAAC                                 | UGT73F3 and<br>UGT73P40<br>cassette |
| YPL-HXTF3-F        | CTCCTTGGAACCGTGGAAATGAGGGGTATG                                   | UGT73F3 and<br>UGT73P40<br>cassette |
| F3-L-67-R          | ACCAGAACCACCAGAACCATTAACCTTAAACATCC<br>AAAGCTTTAGACTTC           | Fusion protein<br>cassette          |
| 24-L-F3-F          | GGTTCTGGTGGTTCTGGTATGGAAGGGGTGAAG<br>TTGAAC                      | Fusion protein<br>cassette          |
| F3-L-67-F          | GGATGATGGTTCTGGTGGTTCTGGTATGATGGAAT<br>CTCAACAATTGC              | Fusion protein<br>cassette          |
| L-his-67-R         | GAACCATGATGATGATGATGATGGTCGACGGCGC<br>TATTATTAACCTTAAACATCCAAAGC | Fusion protein<br>cassette          |
| 24-L-F3-R          | ACCAGAACCACCAGAACCATCATCCAATTTGAGG<br>TCTCTCAATC                 | Fusion protein<br>cassette          |
| lac-YOL-F          | GAGCTCGGTAGGTGTGGTTTTCGGCATTATC                                  | Pn022859<br>overexpression          |
| TE-YOL-R           | GATCTGATATGATTACCAGCTTGATTCGCGGGCTG                              | Pn022859<br>overexpression          |
| YOL-TE-F           | CTGGTAATCATATCAGATCGATCCCCACACACCA<br>TAG                        | Pn022859<br>overexpression          |
| G1-CY-R            | AACCTAGTGGCAAATTAAGCCTTCGAGCGTC                                  | Pn022859<br>overexpression          |
| CY-G1-F            | GCTTTAATTTGCCACTAGGTTTTTCTCCTTGACG<br>TTAAAGTATAG                | Pn022859<br>overexpression          |
| 859-G1-R           | GGATCCTTTCAAAAATTCTTACTTTTTTTTTGGAT<br>GGACGCAAAG                | Pn022859<br>overexpression          |
| G1-859-F           | GTAAGAATTTTTGAAAGGATCCGGATCCATGGCTT<br>CTACTACATC                | Pn022859<br>overexpression          |
| PG-859-R           | GAGCGATTTGTCTTAATTACCTTTTCTAGTCAACA<br>TACCACCAATAATTGG          | Pn022859<br>overexpression          |
| 859-PG-F           | GACTAGAAAAGGTAATTAAGACAAATCGCTCTTA<br>AATATATACCTAAAGAACATTAAGC  | Pn022859<br>overexpression          |



|            |                                                                  |                            |
|------------|------------------------------------------------------------------|----------------------------|
| YOR-PG-R   | GATGATAGTTGGTCCGTAGTTT<br>CAGTGC                                 | Pn022859<br>overexpression |
| PG-YoR-F   | GGAAGAAAAACACTAACTACGGACCACTATC<br>ATCCGCTAATTAC                 | Pn022859<br>overexpression |
| YOR-R      | CAAGCTTGCATGAAGTAGCGATCAGACTACG                                  | AtUGDH<br>overexpression   |
| AD-CY-R    | GTCGCTCCTAGTGGCAAATTAAGCCTTCGAGC                                 | AtUGDH<br>overexpression   |
| CY-AD-F    | CTTTAATTTGCCACTAGGAGCGACCTCATGCTATA<br>CC                        | AtUGDH<br>overexpression   |
| G1-AtU-R   | GGAGAAAAAACTCTGTGATGGTTAAAATTTGTTG<br>TATTGGTGCTGG               | AtUGDH<br>overexpression   |
| AtU-G1-F   | CCATCACAGAGTTTTTCTCCTTGACGTTAAAGTA<br>TAGAGG                     | AtUGDH<br>overexpression   |
| YoR-Gal-R  | GCGGATGATAGTTGGTCCTTTCAAAAATTCTTACT<br>TTTTTTTTGGATGG            | AtUGDH<br>overexpression   |
| Gal-YoR-F  | GTAAGAATTTTTGAAAGGACCAACTATCATCCGC<br>TAATTACTGAC                | AtUGDH<br>overexpression   |
| Gal-F3-F   | GTAAGAATTTTTGAAAGGATCCGGATCCATGGAA<br>GGGGTTG                    | UGT73F3<br>overexpression  |
| PG-F3-R    | GCGATTTGTCTTAATCATCCAATTTGAGGTCTCTC<br>AATCTC                    | UGT73F3<br>overexpression  |
| F3-PG-F    | CCTCAAATTGGATGATTAAGACAAATCGCTCTTAA<br>ATATATACCTAAAGAACATTAAGC  | UGT73F3<br>overexpression  |
| Gal-F3-R   | CAAGGAGAAAAAACTCTGTGATGGAAGGGGTTG<br>AAGTTG                      | UGT73F3<br>overexpression  |
| YHL-F      | GAATTCGAGCTCTGCAACTTGTCAGCCTTTG                                  | Pn022859<br>overexpression |
| M17p-YHL-R | CCTCAAGAGAAAAAGCAAAAATAATCACTGAG<br>CTTCTGTTGCTG                 | Pn022859<br>overexpression |
| YHL-M17p-F | GCTCAGTGATTATTTTTGCTTTTTCTCTTGAGGTC<br>ACATGATCG                 | Pn022859<br>overexpression |
| YHR-M17t-R | CCACTGTATGTATGTGCCCTCGCTTTTATATTTAAT<br>AACTAACATTTTTATCAACG     | Pn022859<br>overexpression |
| M17t-YHR-F | GTTATTAATATAAAAAGCGAGGGCACATACATACA<br>GTGGGACATTATGAG           | Pn022859<br>overexpression |
| YHR-R      | GCTTGCATTCAGCAGAGGCGTAAAAGTGC                                    | Pn022859<br>overexpression |
| G2-M17t-R  | CCTTGGATTAGTACAGCTTTTATATTTAATAACTAA<br>CATTTTTATCAACGATGGAATTCC | Pn022859<br>overexpression |
| M17t-G2-F  | GTTAGTTATTAATATAAAAAGCTGTACTAATCCAA<br>GGAGGTTTACGGACCAGG        | Pn022859<br>overexpression |
| 859-G2-R   | GGATCCGGATCCTATGAAAGAATTATTTTTTTTATT<br>ATGTTAATCTTGTGTTTACTTAAC | Pn022859<br>overexpression |

|             |                                               |                            |
|-------------|-----------------------------------------------|----------------------------|
| G2-859-F    | CTTTCATAGGATCCGGATCCATGGCTTCTACTACA<br>TCTTTG | Pn022859<br>overexpression |
| YHR-PGI1t-R | CTCGCGTAGTTTAGTGTTTTTCTTCCAGTGCGAG            | Pn022859<br>overexpression |
| PGI1t-YHR-F | GAAAAACACTAAACTACGCGAGGGCACATACATA<br>CAG     | Pn022859<br>overexpression |

---

Table S3 Constituents of trace metal solution

| Composition                                          | Concentration (g/L) |
|------------------------------------------------------|---------------------|
| EDTA                                                 | 15                  |
| ZnSO <sub>4</sub> • 7H <sub>2</sub> O                | 6.25                |
| MnCl <sub>2</sub> • 4H <sub>2</sub> O                | 0.32                |
| CuSO <sub>4</sub> • 5H <sub>2</sub> O                | 0.8                 |
| CoCl <sub>2</sub> • 6H <sub>2</sub> O                | 0.5                 |
| Na <sub>2</sub> MnO <sub>4</sub> • 2H <sub>2</sub> O | 0.5                 |
| CaCl <sub>2</sub> • 2H <sub>2</sub> O                | 2.9                 |
| FeSO <sub>4</sub> • 7H <sub>2</sub> O                | 2.8                 |

Table S4 Constituents of vitamin solution

| Constituents                | Concentration (g/L) |
|-----------------------------|---------------------|
| Biotin                      | 0.05                |
| Calcium pantothenatel       | 1                   |
| Nicotinic acid              | 1                   |
| Myo-inositol                | 25                  |
| Thinmine-HCl                | 1                   |
| Pyridoxal-HCl               | 1                   |
| <i>p</i> -Aminobenzoic acid | 0.2                 |

Table S5 Enzymes used for phylogenetic tree analysis and sequence alignment

| No. | Enzymes           | Species                                      | Accession number |
|-----|-------------------|----------------------------------------------|------------------|
| 1   | GuCSyGT (GuCsl)   | <i>Glycyrrhiza uralensis</i>                 | LC500232         |
| 2   | GmCSyGT1 (GmCsl1) | <i>Glycine max</i>                           | LC500227         |
| 3   | GmCSyGT2          | <i>Glycine max</i>                           | LC500228         |
| 4   | GmCSyGT3 (GmCsl3) | <i>Glycine max</i>                           | LC500229         |
| 5   | LjCSyGT           | <i>Lotus japonicus</i>                       | LC500233         |
| 6   | GmCSIM1           | <i>Glycine max</i>                           | LC500230         |
| 7   | GmCSIM2           | <i>Glycine max</i>                           | LC500231         |
| 8   | PttCesA8          | <i>Populus tremula x Populus tremuloides</i> | 6WLB_A           |
| 9   | AAT09895          | <i>Populus tremula x Populus tremuloides</i> | AAT09895         |
| 10  | WP_012408188      | <i>Nostoc punctiforme</i>                    | WP_012408188     |
| 11  | KAF3445492        | <i>Rhamnella rubrinervis</i>                 | KAF3445492       |
| 12  | At1G55850         | <i>Arabidopsis thaliana</i>                  | NP_175981        |
| 13  | At4G23990         | <i>Arabidopsis thaliana</i>                  | NP_194130        |
| 14  | At4G24010         | <i>Arabidopsis thaliana</i>                  | NP_194132        |
| 15  | At4G24000         | <i>Arabidopsis thaliana</i>                  | NP_567692        |
| 16  | At1G32180         | <i>Arabidopsis thaliana</i>                  | NP_001321681     |
| 17  | At1G02730         | <i>Arabidopsis thaliana</i>                  | NP_171773        |
| 18  | At3G03050         | <i>Arabidopsis thaliana</i>                  | NP_186955        |
| 19  | At2G33100         | <i>Arabidopsis thaliana</i>                  | NP_001324935     |
| 20  | At4G38190         | <i>Arabidopsis thaliana</i>                  | NP_195532        |

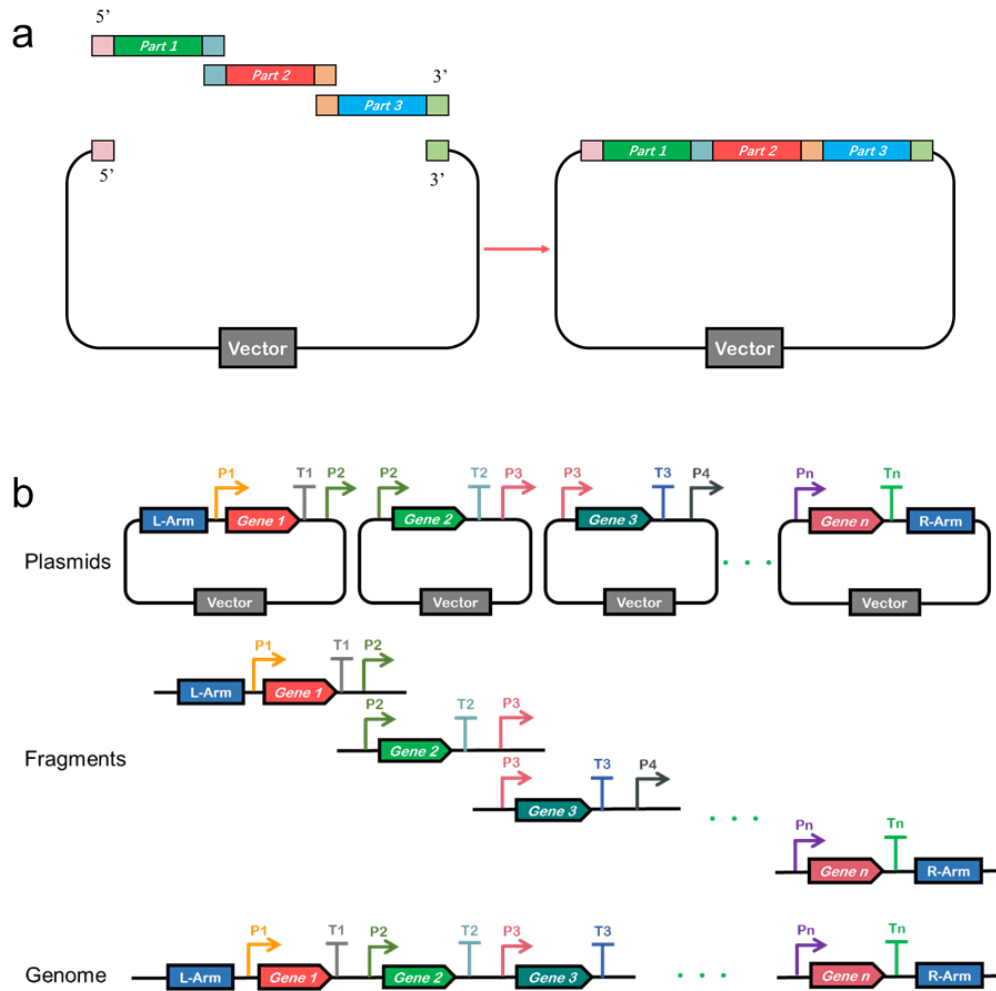

Fig. S1 Diagram of the construction strategy of engineered strains. **(a)** Plasmids construction. Gene elements were amplified with primers having 15-25 bp overlap by PCR and assembled into a plasmid by Gibson assembly. **(b)** Genome integration. Gene cassettes with homologous region were amplified and integrated into the genome through homologous recombination.

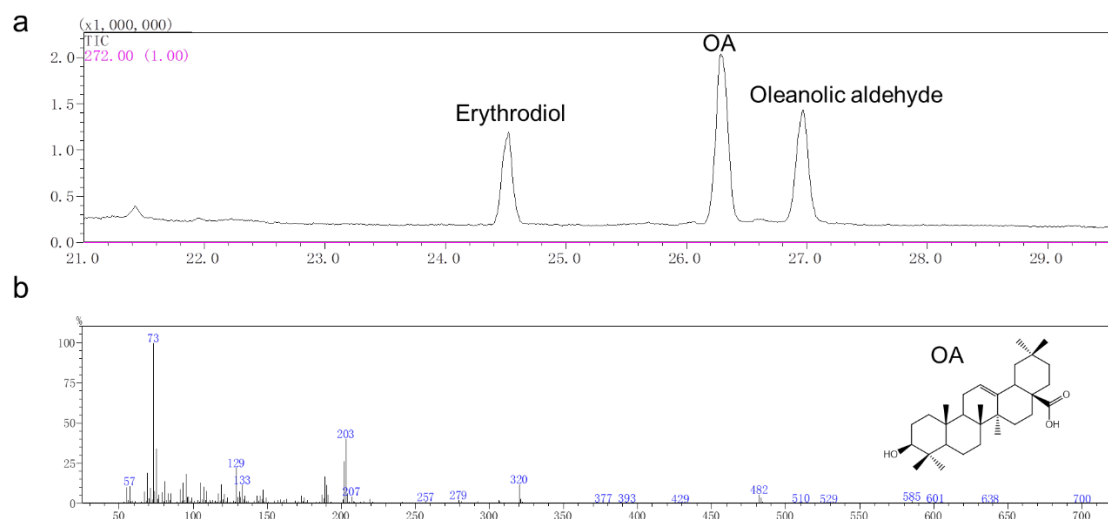

Fig. S2 GC-MS analysis of the fermentation products of strain OA01. (a) Chromatogram result of fermentation products of strain OA01. (b) Mass spectrum of OA. The GC-MS analysis was performed through a GCMS-QP2010 Ultra (Shimadzu Scientific Instruments) equipped with a SH-Rxi-5Sil MS (30 m × 0.25 mm × 0.25 μm, SHIMADZU, Japan) GC column. The flow rate of carrier gas helium was 1.2 mL/min and the split ratio was 5:1. The compound separation procedure was as follows: injection volume of 1 μL, injector temperature of 250 °C. Column temperature started with 80 °C and was kept for 1 min, then raised to 290 °C with increase of 20 °C/min and kept at 290 °C for 20 min. Ion source temperature was set 200 °C and interface temperature was set 290 °C. Scan mode was used and the m/z ranging from 50 to 700 was monitored.

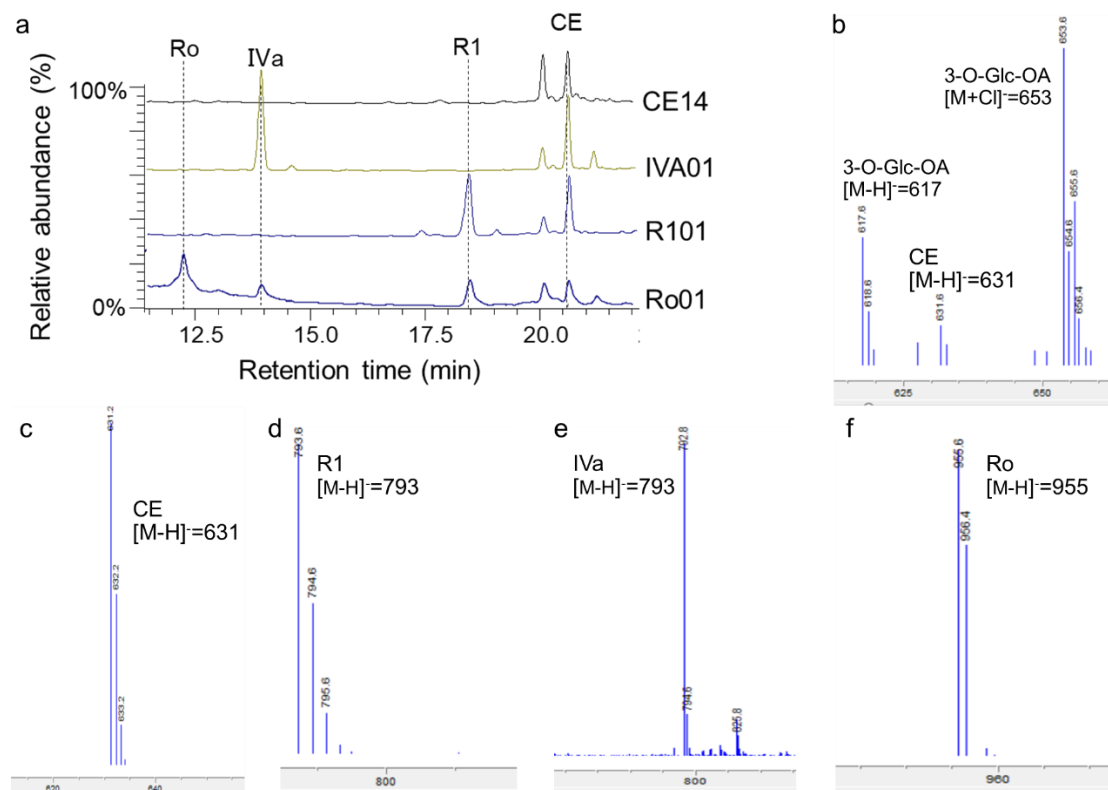

Fig. S3 UPLC/LC-MS results of the fermentation products of engineered strains. **(a)** UPLC results of the fermentation products of strains CE14, IVA01, R101 and Ro01. **(b)** LC-MS result of fermentation products of strain CE01. **(c)** LC-MS result of fermentation products of strain CE09. **(d)** LC-MS result of fermentation products of strain R101. **(e)** LC-MS result of fermentation products of strain IVA01. **(f)** LC-MS result of fermentation products of strain Ro01.



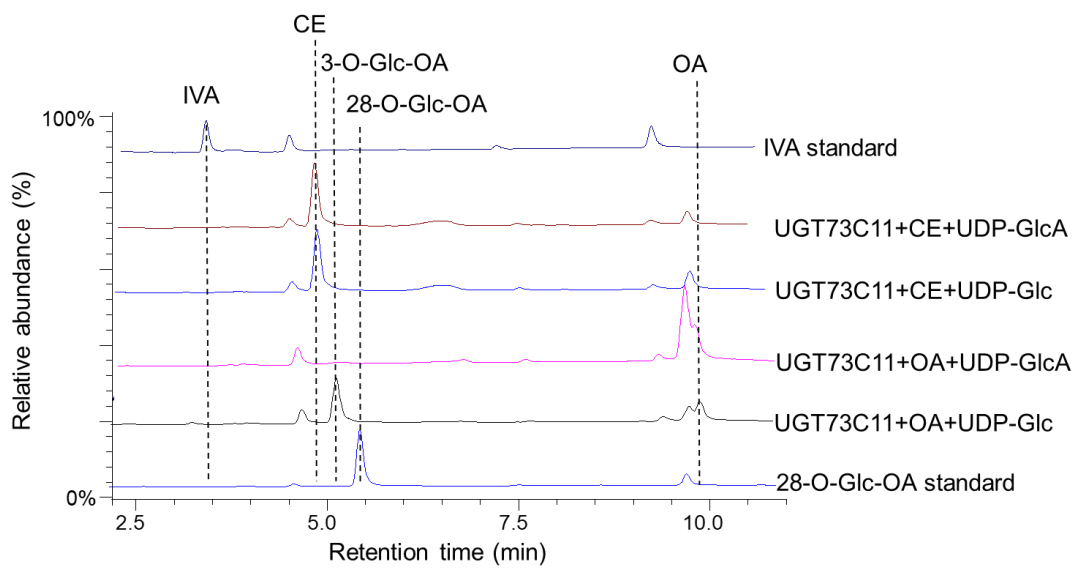

Fig. S4 UPLC results of the function of UGT73C11 toward OA and CE.

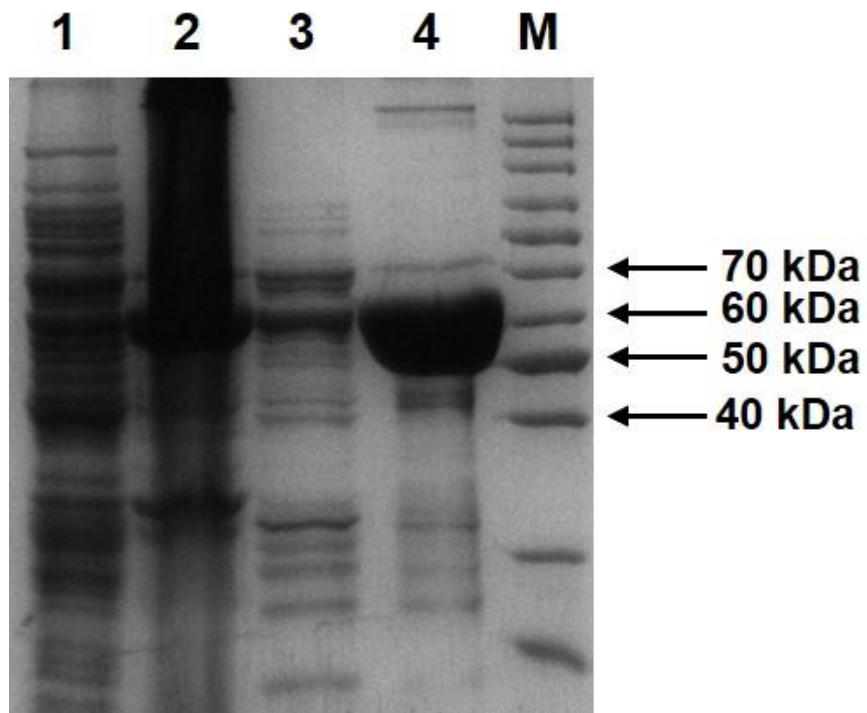

Fig. S5 SDS-PAGE analysis of UGT73F3 (1: supernatant, 2: sediment, 3: 5% imidazole elution, 4: 20% imidazole elution, M: marker).

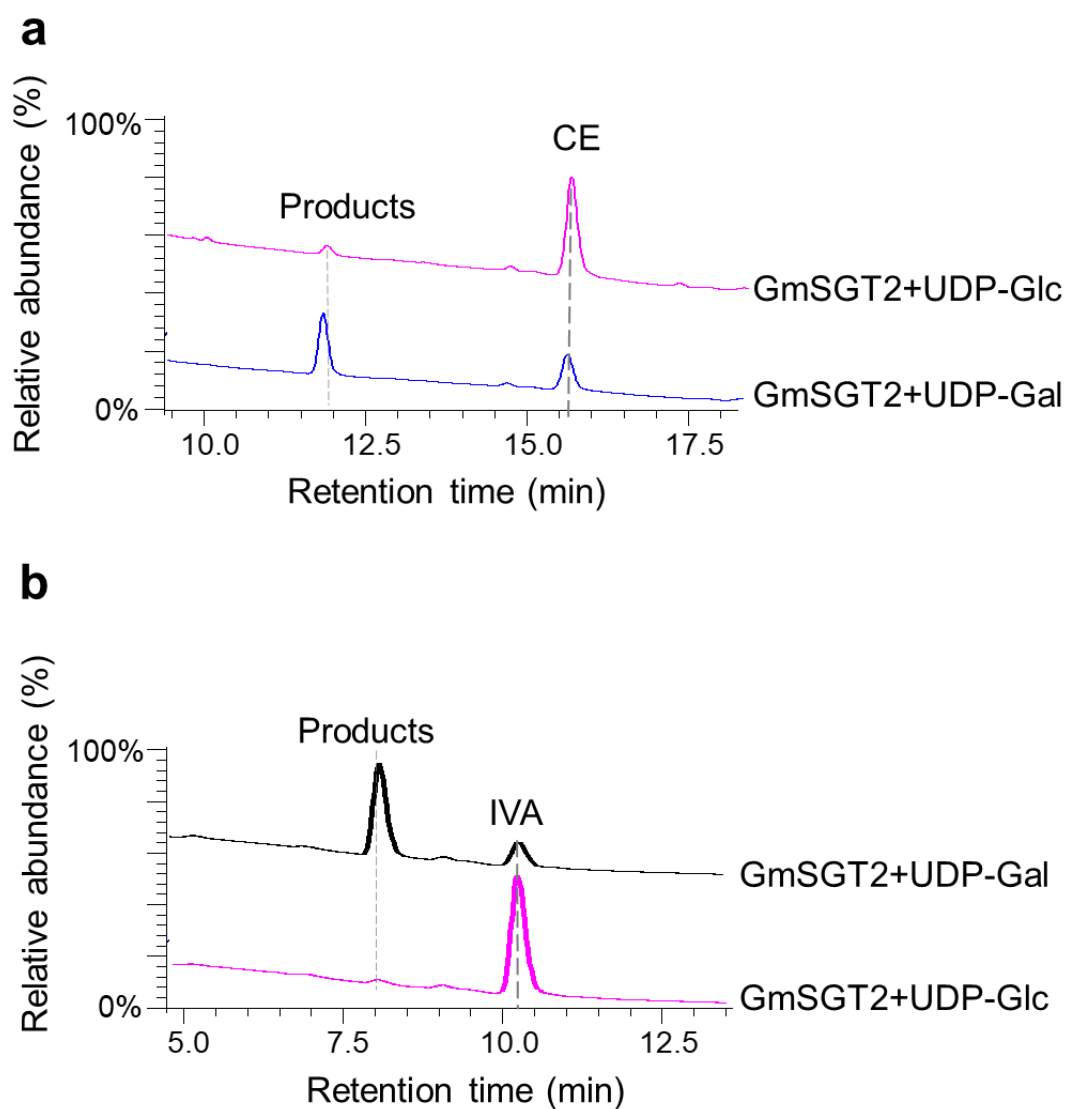

Fig. S6 UPLC results of GmSGT2 enzymatic assays. **(a)** UPLC results of the reaction of CE with UDP-Glc/UDP-Gal catalyzed by GmSGT2. **(b)** UPLC results of IVA with UDP-Glc/UDP-Gal catalyzed by GmSGT2.

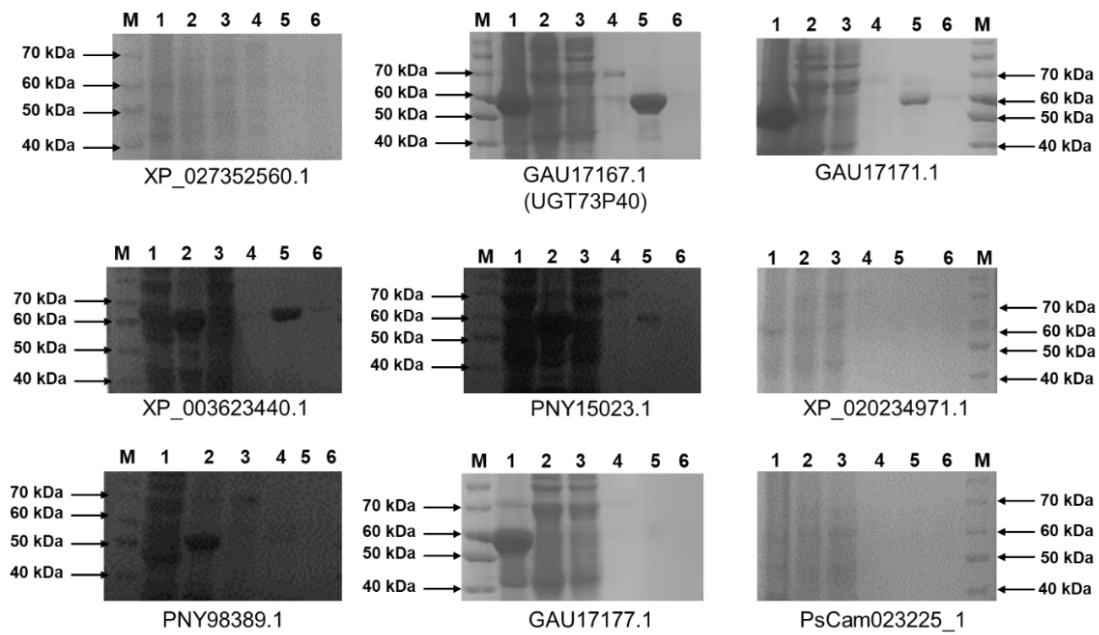

Fig. S7 SDS-PAGE analysis of nine UGTs candidates (M: marker, 1: sediment, 2: supernatant, 3: flow through, 4: 5% imidazole elution, 5: 20% imidazole elution, 6: 100% imidazole elution).

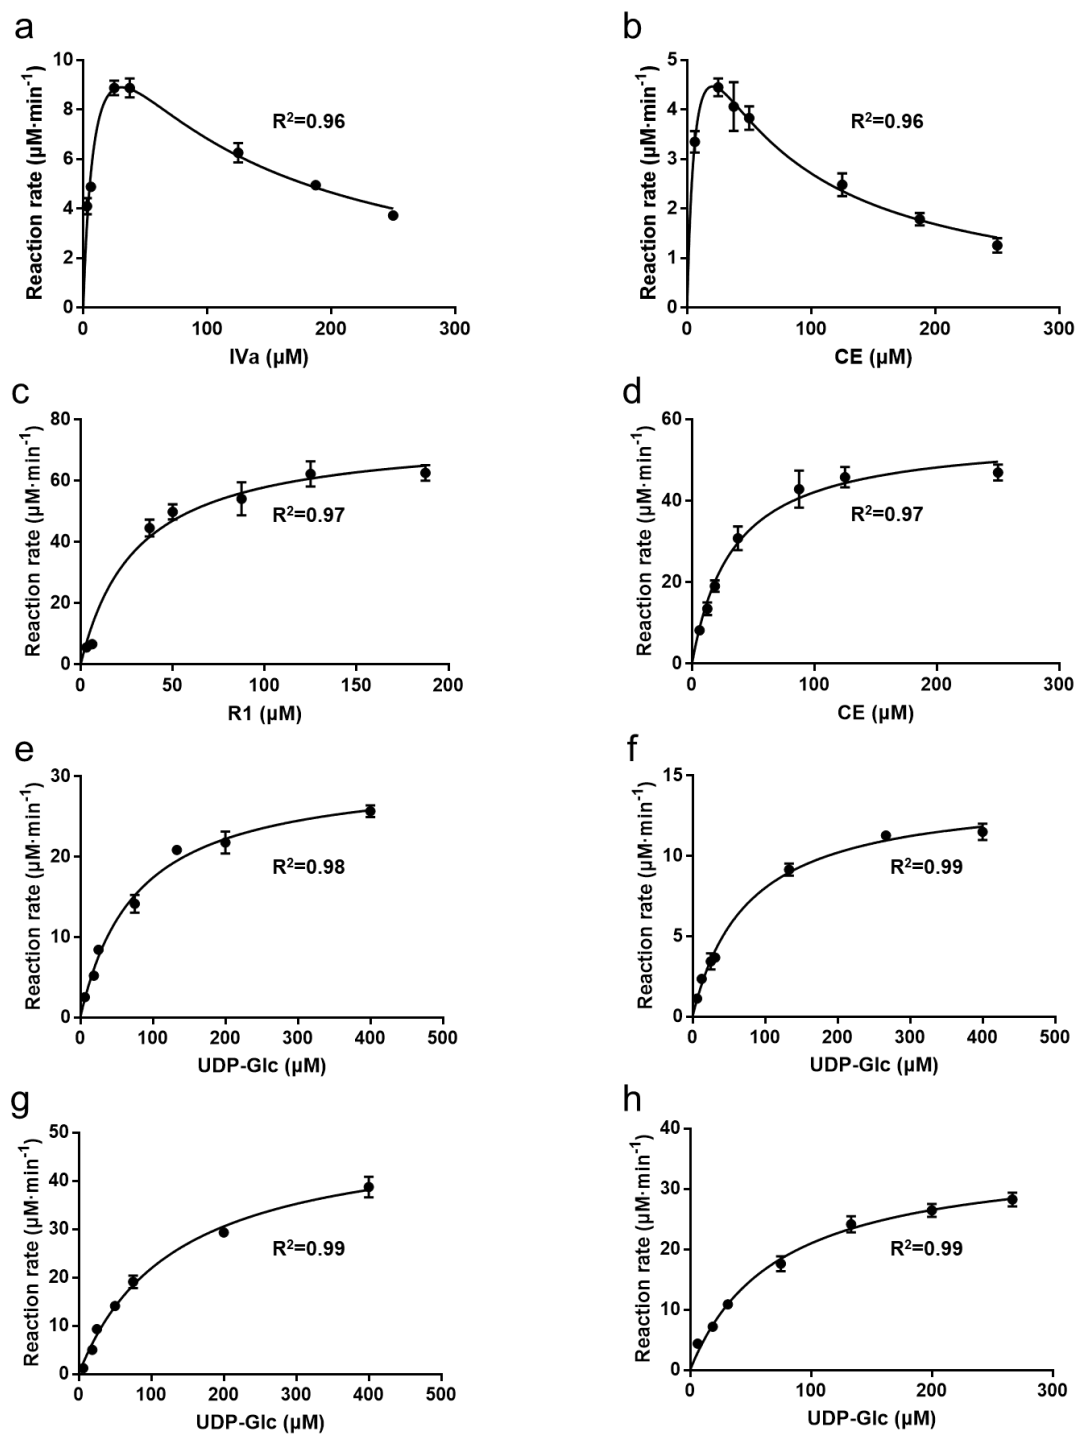

Fig. S8 Michaelis-Menten kinetics characterization of UGT73P40 and UGT73F3. **(a)** UGT73P40 towards IVa. **(b)** UGT73P40 towards CE. **(c)** UGT73F3 towards R1. **(d)** UGT73F3 towards CE. **(e)** UGT73P40 towards UDP-Glc with IVa as the acceptor. **(f)** UGT73P40 towards UDP-Glc with CE as the acceptor. **(g)** UGT73F3 towards UDP-Glc with R1 as the acceptor. **(h)** UGT73F3 towards UDP-Glc with CE as the acceptor. All data are presented as means  $\pm$ SD of three independent repeats.

**Gene sequences obtained in this study:**

**Pn007110**

ATGGCAACCCTTTCTCTTCATACATGCACTGTTTCAGCAACCTCGTGCAATAATCAACAG  
AATTCATATATTTTTCCACTTCATAGCCATAATTGGCCTAGTCTATTACAGAATCTCTAAC  
ATCTTTTATGGTGATGGAAATGTACCAGTTTTAGCATGGGGCCTTATGACCACGGCTGA  
GCTTATATTTACCTTCCTTTGGTTTTCTCACGCAAGCATTTCGCTGGAGGCCAGTGGCTCG  
GACAATTTATCCAGAAAATCTTCCGGGGGATGAGGAGTTACCAGGGGTTGATGTGTTC  
ATATGCACAGCTGATCCCAATAAAGAGCCAACCTATAGAGGTGATGAACACGGTGTGTC  
AGCTATGGCACTTGACTATCCACCGGATAAGCTCACCGTGTATCTGTCTGATGATGGTG  
GTGCAGCCTCGACACTGGATGCGATAACAGAAGCATGTTCAATTTGCAAAGTCTTGGCT  
ACTTTTTTGTAGAAAATATGGGATCAAGACCAGATGTCCTGAAGCATATTTTTCTAAATT  
TGGCGATGATGAACGTCTTCTGAGGAGCGATGAATTC AAGGCAGAGGAAGAAAAGAT  
TAAGTCGAAATATGATCTGTTCAAGATAAATGTTGAAAAAGCTGCCATGGAAGATGCCG  
TTGTTTCATGATCGACCCCTCACATCAAGGTAATACATGATAATAGCAAGGATGTAAAC  
AATGATGACGTCCAAAATAAGATGCCTCTTCTTGTATGTATCCCGTGAGAAAAGACC  
ATCTCGTCTCATCGTTTCAAGGCTGGCGCCCTCAATGCGCTTCTTCGAGTTTCTGGCA  
TAATGAGCAATGCCCCCTACATAATAGTGTTAGATTGTGATATGTA CTGCAATGACCCTG  
CCTCAGCCC GACAAGCAATGTGCTTTCATCTGGACCCTGAGATGTCTCGAACTCTCTCT  
TATGTACAATACCCTCAAATTTTTCTATAATGTTAGTGAAAATGATATATACGACGGCCAA  
GCAAGATCAGCATAACAAGACAAGGTATCAAGGTATGGATGGACAACGAGGTACAGTTT  
GTGCAGGA ACTGGTTATTACTTGAACAAAAAGGCATTATATAGTAGTCCCAATCAAGAG  
GTGAAA ACTCGTCAATGTTTATATAGCTTTCCTTTTCCGTTGATTTACAGACAAGTTT  
CTGCTCGAAC CAGAAAAGAATTTTGGTATATCTAGCGTGTTTCATTGCCTCACTAAAAGG  
TAGTGACAAAGAAGATACATCTGGAGTGAGAGATTTATCAGAAGCAATTATAGAAGAG  
GCCAAAATTCTGGCCTCTTGTGACTTTGAGAAAAACACACAATGGGGTAAAGAGATTG  
GCTACTCCTATGATTGTTTGTGGAGAGCACATTCACGGGGTATCTTTTGCACAACAAA  
GGATGGCGTTCTGTCTATCTTTATCCAAAAAGGCCATGTTTCTTGGGTTGCACCACCATT  
GACATGAAGGATGCTTTGGTCCA ACTCATGAAATGGTCTCTGGATTGCTTCAAGTTGG  
TCTCTCTAAGTTTAGCCCTGCCATATATGGTATGTCAAGGATGACCATTCTCCAAACTAT  
GTGCTACGGGTATTTACGTTTTTACCCCTTTTCTCAGTTGCTTGCCTATTATATGGAATT  
ATTCCTCAGCTATGTTTCTTGAGTGGCACTCCCTTGTACCCAAAGGTCTCAGACCCATG  
GTTTTTGGCATTGCAACAATTTATACATCATCCCTTTGTCAGCATTGTACGAAGTCCT  
CTCTAGCGGCGGCACAATTAGGACATGGTGGAAATGAACAAAGAATTTTTATGATAAAGT  
CAGTTACAGCTTTGCTGTTTGGATGCCTAGATGTTCTAATGAAGTGGGTGGGCATAACA  
AAAGCGAGTTTCAGGCTGACAAATAAAGCCGTCGACCAAGAAAAGCTCGAAAAATAT  
ATGAAAGGCAAATTTGACTTCAGTGGTGCAAAGATGTTTCATGATTCCACTGACATTATT  
AGTCATACTGAACGTGCTATGCTTTATAGGTGGAGTGAAAAGGGTAATAGGCGAGAAA  
AACTTTGAAGAGATGTTTGTCTCAGGCTTTTCTTTCTTCTTCTTCAATTCTAGTTCTCAGTTTT  
CCTATACTCAAGGGGCTCATACCAAAGAGAAACAAGTGA

**Pn007111**

ATGAGCAAGGCAATGGAAAATATTCTTCTCCTCCTCCATTCATGCCAAGTTCATAAGCTTCC  
TCTAATTATCAACAGATTCATTCCCTTATTCCATTCATAGCGTTATCATTCCTAGTCTATT  
ATAGAGTTTCCTTTATCTCCCAAACCCTAGGAACAAAAACACACCAATATTATCCCAT  
CTTCTTGTTTTTGCTTCTGAGATCATACTCTCCTTTATTTGGCTCCTCAACCAAGCTTAC  
CGATGGCGTCCCGTCTCCCGGAAGGTCTCCCGGATAGATTACCGGAAGATAAAGAAC  
TTCCGGCCATCGACGTGTTTATATGTACTGCTGATCCCAATAAGGAGCCAACCTTTGGGA  
GTGATGAATACTCTTATACTGCCATGGCGTTGGATTATCCAGCTGATAAACTCAATGTT  
TATCTTTCCGATGATGGGGGTTCTCCGGTGACTTTGAAAGCCATGAAGGAGGCTTGGAA  
AATTTGCCAAGTGGTGGCTGCCCTTCTGTAGGAGATATGACATTAAGACTAGCTGCCCT  
GAGGCTTATTTTTCGGCTTTGGAGGAGCATGATAATTATGGGGATTTTCATGGCAGTGA  
ATTTGTAGCTGACAGAAAAATTATCAAGGAAAAATATGAAGCGTTCACGGAGAGTGTG  
ATGAGAATTAGAGACAGTGAAATCACCATACTTAATCGCGATCATTCTTCTGTTGTTGA  
GGTGATACATGATAAAGCCGCCTTAGACCCAAGTGGGATGCCTCTTCTTATTTATGTATC  
GCGTGAAAAAGACCAGTTCATCATCATCATTTTAAAGCTGGAGCTCTGAATGTTCTTC  
TAAGAGTCTCGAATATGATAAGCAATTCGCCATACATTCTAGGCCTGGACTGTGACATTA  
AGACGGACATATACGATAGTCAGTTGAGAACCTATTTTGAGGTACTATGGCTAGGTATG  
GATGGACTAAAAGGACCTCCCATATCTGGTACATGCTATTATATAAAGAGGGAGGTATTC  
TATGGAAATCAATGCAAGATGATTTTGACGTCAAGGAACTTAAACATATTTTTGGTAC  
ATCAAATGACTTCATCAAATCCCTTACTGGGAACAATAAAGCTAGTACCATTGATGATC  
AGAACTTAAACCAGTGCATTGCTAGAAGAGAGCAAACCTTGTGGCCTCTTGTGCTTACGA  
GAATGATACAAATTGGGGCAAAGAGGCAAGTTTCCGGTATTTTTCCGTGGTAGAAGATT  
ACTTTACAGGATTCAACTTGCATTGCCAAGGTTGGAGATCTGTGTATTTGATCCACCA  
AGGCCAGCATTTTTGGGTGCCGGCACCAAAATCTTAGTGATGTATTGGTTCAAAGCAC  
GCGATGGAGTGCCGGGTTGGTGGAAGTTGCCATTTCAAAGTTCCTCCCTCTTGTTTATG  
GTTCACTACGAATGCCTATTCTTGAGGCCATGTGTTATGCAGAGCTTGCCTCCTTCCCT  
TCTATTTCTTCCCCCTATGGTGTCTAGCTACCATCCCTCCATTATGTCTACTTAATGACAT  
TCCTTTGTTCCCAAAGTTTCAAGTTCATTTTTCGTCCTATTCTCATTAAATTTGTCTCT  
TCGCAATTGAAACACATAAAGAGATTTTCTCTAATGGAGGGTCATTCCAACTTGGAG  
GAATGAACAGAGAATGTGGATGATTAAGTCCGTCACATGTCACCTTTATGGAAGCTTGA  
ATGCAATTATGGAGAAAATGGGTATGAGAGAAGCTAGCTTCTTACCAACAAACAAAGT  
CGTTGATGACGAACAACCTTAAACGATACCAAATGGGCATATTTGATTTCCAAGCATCGA  
CTATGTTGCTTGCTCCGCTTTGTACCTTAAATCGCCTTAAATTTAGCTGCTGTAGTTGGGG  
GAGTTGCAAAGCAGTTCTTGCAAGGAGCTGCAATGAGATGTTTATTCAAATTTTCCCT  
TCATTTTTCGTGGTGACTTTGAATTATCCGATCATTGAAGGTATGATACTGAGGAAGGAT  
AAAGGTCGCATTCACCTCCGTTACTCAATTATCTATCGCTATTACCATAATTATCTTGA  
CATGTGGAAAGTTTATTCTCAAGTGA

**Pn016322**

ATGAATGAGGCAATGGGAATGGATAAACTCTTCTCCTCCTCCATTCATGCCAAGTGCAGAA  
GCTTTCTCTAATCATCAACAGGCTCCATACTTTCTCCATTTTGTAGCTCTATTATTTTAT  
TTCATTACAGAGTTTCTTTCATCTCCCAAACCCTAAGAACAAAAACACACGCCAATCTTA  
CCCATGTTCTTGTGTTGCTTCTGAGCTCATACTCTTTTTATTTGGCTCCTCAACCAA

GCTTACCGATGGCGCCCCGTCTCTCGAAAGGTTTTCCCCGAGCGATTGCCGGAAGATA  
AACAACTTCCGGCCATCGACGTGTTTATATGTACGGCTGATCCCAATAAGGAGCCA  
TTGGGAGTGATGAATACTCTTATATCTGCCATGGCGTTGGATTATCCGGCTGATAAGCTG  
AATGTTTATCTTTCGGATGATGGGGTTCTAAGGTGACTTTGAAAGCCATGAAGGAGGC  
TTGGAGATTGCCAGGTGGTGGCTGCCCTTCTGTAAGAGATTGGTGTAAAGACTAGGT  
GCCCTGAGGCTTATTTTTCTGCAACAGAGGAGCAAGATGATGGTAATTATGGGGATTTT  
CTTACTAGCGAGTTTGTAGCCGAGAAAAATATTGTTTCAGGAAAAATATGAGGAGTTCAC  
AGGGAGTGTGATTAGAATTAGAGAAAAATGAAATCCCCATACTTAATATAGATCATCCTTC  
GGTTGTTGAGGTGATCCATGACAAATCCTTGGACCAAATTGTGATGCCTCTCCTTGTTT  
ATGTTTCGCGTGAGAAAAGACCAGCTTATCCTCACCATTTCAAAGCTGGAGCACTGAA  
CGTCTTCTGAGAGTCTCGAGCATGATAACAATTCAGCATACTACTAGGGCTGGATT  
GCGACATGTATTGCAATGATCCAATTCAGCACGCCAAGCAATGTGTTTCCTTCTTGAC  
CCCAAGATATCTCCCTCATTATCTCATGTCCAATTCCTCAAAAATTCCACAATATTAGC  
GAGACCGACATCTACGATAGTCAACTGAGAGACGTTTTCAAGGTACGATGGCCGGGTA  
TGATGGACTCAAGGGACCAACCATAAGTGGTACATGCTATTATATAAAGAGAGAGAC  
GTTCTATAAAAGATCTATGCAAGATGATATAAATGATATCGATCTCAAGGAACTCAAACA  
TATTTTTGGTACATCAAATGAGTTCATCAAATCCCTTCACCGGAAATACAACCCTAGTAT  
CACTGATGATGGAAAATTCACCAACGTATTGCTAGAAGAGAGCAAGCTTCTAGCCTCTT  
GTGCCTACGAAACCAATACCAAATGGGGAAAAGAGGCAAGTTTTTCGATATTTTTCCGT  
GATAGAAGATTATTTTACAGGATTCAATTTGCACTGCAAGGGTTGGAGATCTGTGTATCT  
TGATCCACCAAGACCAGCATTTTTGGGTGCTGGCACCACAAACCTTGACGATGTCTTG  
GTTCAAGGCACGCGATGGACCGCTGGGCTGGTGGAAAGTTGCCATTTCAAAGTTCAACC  
CTCTTATTTATGGTTCACTCAGAATGTCTATTCTTGAGGCCATGTGTTATGCAGAGCTTG  
CTTTATACCCCTTCTATTTTTTCTCACTATGGTGTCTAGCTACCATTCCCTCAGCTCTGTCT  
ACTCAATGACATCTCTCTGTACCCAGAGGTTTCAAGTTCATTTTTTCGTTCGTATTCTCATT  
AATATTCGTCTCATCCCAATTTAAACACATACAAGAAATTTCTTTACCGGAGGGTCGTT  
CCAAACTTGGAGGAATGAACAGAGGATGTGGATGATAAAGTCCATTACATGTTATTTTT  
ATGGAAGCTTGAATGCGATTATGGAGAAAATTGGTATGAGAGAAGCCAGCTTTTTACCA  
ACCAACAAGGTTGTGGATGATGAACAACCTTAAACGATACCAAATAGGTAAGTTTGATTT  
TCAAGCATCGACTATGTTACTTGCTCCACTATGTACCTTAGTCACCCTAAATTTGGCTTC  
CTTAGTCGGGGGAGTTGTGAAAGCGATTCTTACAAAAGTTGCAATGAGATGTTTATTC  
AAATTTTCTCTCATTTTTTTGTGGCAACTCTGAGCTATCCAATCATTGAAGGTATGATATT  
GAGAAAAGATATGGGTCGCATTCCACCTTCTGTTACTCGATTATGTATCGTTTTAACTAT  
ACTTTTGTGACTTCTGGAAAATTTATTGTCAATTGA

**Pn022859**

ATGGCTTCCACAACCTCTCTCCTCCACACAGCCACCGTACATAAACTTCATGCCACCAT  
GAACAGAACTCACATCCTCTTCCACTTCTTCTCATCCTTTCCGTTTTTTACTATAGACT  
ATTCTCTCTCCTCAACTCCACGCCGGACCACAACCTTCCGGCGACGTCATGGATTTTCA  
TGATTATCGCCGAACCTACTAACCTTTGCATGGTCTTTCGGTCAATCTTTCGGTGGA  
GGCCGGTGTCCCGGTCCGTGCACCCGGAAGACTGCCCGGAGACAAATCGCTGCCCG  
GGGTGGATGTTTTTATCTGTACGGCTGATCCGAAGAAGGAGCCAACCCTAGAGGTGAT  
GAATACGGTGATATCGGCTATGTGCTTGGACTACCCGCCGGAGAAGCTTGCCGTCTATC



TTTCCGATGACGGTGGCGCTGCGGTGACCTTGACTGGAATGAGGGAAGCTGCTGTGTT  
TGCTAGGTGGTGGATTCCGTTTTGCCGGAAGTACAATATCAAGACAAGGTGCCCCGGG  
GCTTATTTTTTCAGCTTTAACCGACGGCAATGAACAAGATATTCGTGGTGGTGAATTTCA  
AGTTGAACAAGACAAAATCAAGTTAAAGTATGAACATTTCAAGGAAGTTGTGGAGAG  
TGGAGGAGATGATGCTCAAGCTGATGACATGAACAACATTACCGGTGATGGCCGTGCA  
CCTCTAGTTCAGGTGATTCATGATAGTAGTAGAGGCAATGAAGATGATGAGAATGATGA  
GAATGATGAGCAGATGCCACTCCTTGTATATGTTTCTCGTGAAAGAAGACCATCTTACC  
CTCATCGTTTTCAAGGCCGGAGCTCTCAATGCCCTTCTTCGAGTGTCTGGAATAATTAGT  
AATTTCCCATACGTAATGGTATTAGATTGCGACATGTATTGCAATGACCCAACCTCGGCT  
AAGCAAGCAATGTGCTTCCACCTTGATCCAAACATGTCTTCCGAATTAGCTTTCGTTCA  
ATACCCTCAAGTCTTCTACAATGTCACCAGCAATGACATCTATGATGGCCAAGCGAGAT  
CTGCCTTCAAGACCAAGTGGCAAGGTATGGATGGACTAAGAGGACCTGTTTTGACTGG  
CACTGGCTACTACCTAAAGAGAAAGGCATTATTCGGCAGCCCTAATGATCAAGAAGTTA  
CTTATCTCCATCAACCTGCATTAAGTTTTGGTAATTCGGACATGTTCAATTGCGTTCGCTAC  
ATGGTAACAACCAGAAACATATTGTCAATAACGGAGAAACAACGGAGGAGCAGCAGC  
TAAAGGAAGCACATGTGTTGGCAAGTTGCAGCTTTGAGAAAGGCACAAAATGGGGCT  
CCGAGATAGGTTACACGTACGAGTGCCTGTTGGAGAGCACTTTCACCGGCTATTATCTG  
CAATGCAAGGGATGGAATCAGTGTACTGCTACCCAAAGAAACCAGCATTCTTGGGTT  
GTGCCACAATTGATATGAAGGATGCATTGGTTCAACTAAGGAAATGGAATGGAAATCTC  
CTAGAACTTGGATTCTCAAATTCAGTCCACTGACCTATGCAATTTCAAGAATGTCATT  
TCTTCATAGCATGTGTTACGCATACTTTGCCTTCCAGCCCTTGACTTCCCTTTCACTCCT  
CATATATGGCATTGTTCCCTCAGTTTTGCTTCTTCAAAGGCATCGCTCTTTTCCCAAAGGT  
AACAGATCCATGGATTGCGGCGTTTTGCATTTGTATGGGTATCTTCACTTTTGCAGCACTT  
GTATGAAGTTTTGTCGAGTGGAGGCTCATTACGGACATGGTGAACGAACAAAGAATT  
TGGGTGATCAAAGTTGTGTCCGGAAGCTTATTCGGATGCATGGATTGTGTTAGGAAGA  
AGATTGGCATTTCAAAACACTGTGTTAGGTTGACAAATAAAGCTATTGAAAAAGAGAA  
ACTCGAGAATTATGAGAAGGGAAAATTTGATTTCCAAGGGGCACAGATCTTCATGGTT  
CCATTGGTTGGACTAGTCATTTGGAACATGGCTTGTTTGATAGGGGGGATATGGAGAAT  
GTTTGTGGGGGAAATAGTAGTAAATGTTTGGACAACTTTTCCTCTCTTCCTTCCTTT  
CACTCGTTAGTTATCCCATCATAGGAGGGATGCTGACCAGAAAAGGAAATTA

**PsCam023225\_1 (UGT73P48, *E. coli* codon-optimized)**

ATGGATAGTCAGCAGCTGCATGTGGTGTGTTGTGCCGGCCTGACCCCGGGCCATATGAT  
TCCGATGATTGATAACCGCGCGCCTGTTTGCGAAACATGGCGTGAACGTGACCATTATTA  
ACACCCATGCGAACGCGAGCACCTTTCAGAAAACCATTGATAGCGATTTTAAACAGCGG  
CTATAGCATTAAAACGCAGCTGATTCATTTCCGAGCGCGCAAGTGGGTTTACCGGATG  
GCATTGAAAACCTTAAAGATGCGACGAGCCTGGAAATTTTTGGCAAATGATGCAAGG  
CAACCTGATGTTACAAGATCAGATTGAAATCTGCTGCAAGATCTGCAGCCGGATTGCA  
TTATTAGCGATATGACCTATCCGTGGACCGTGGAAAGCGCGGCGAAACTGAACATTCCG  
CGCATTTATTTTTATAGCAGTAGCCTGTTTAGCAACTGCGCGAGCTATTTTCTGCGCAA  
TATCGCCCGCATGATGATCTGGCGAGCGATAACGAGAAATTTACCATTCCGTGCCTGCC  
GCATACCATTTGAAATTACGAGCCTGCAGCTGGCGCGCAGCACCCGCGTGAGCAATAGC  
ACCACGAGCGCGTTTTGGCGAAATGTTTGAAGCGAAAAACGCAGCTATGGCACCTG

TATAACAGCTTTCATGAACTGGAAAGCGATTATGAAAAACTGAGTCAGACCACCATTG  
GCATTAAGCTGGAGCGTGGGCCCGGTGAGCACCTGGATTAACAAAGATGATGAAA  
ACAAAGCGAACCCGCCCATATTGAAAAAGAAGGCGAACTGCTGAACTGGCTGAACA  
GCAAAGCAACGAAAGCGTGCTGTATGTGAGCTTTGGCAGCCTGACCCGTGTGAGTC  
ATGAGCAGCTGGTGGAAATTGCGTATGGCCTGGAAAACAGCAGCCATAACTTTATTTG  
GGTGGTGC GCGAAAAAGATAAAGATGAAGATGGCGAAGGCTTTCTGCAAGATTTTGA  
AGAACGCATGAAAGAAAGCAAAAAAGGCTATATTATTTGAACTGGGCGCCGAGCTG  
CTGATTCTGGATCATCCGGCGACCGGCGGCATTGTGACCCATTGCGGCTGGAACAGCA  
TTCTGGAAAGCCTGAGCGTGGGCCTGCCGATGATCACCTGGCCGATGTTTGC GGAACA  
GTTTTATAACGAAAAACTGCTGGTGGATGTGCTGAAAATTGGCGTGAGCGTGGGCAGC  
AAAGTGAACAAATTTTGGCTGAGCATTGGCGAAGATCATGTGGTTGTGCGCCGCGAAG  
ATATTGCGAAAGCGGTGGAAATTCTGATGGGCAGCAGCCAAGAAAGCAAAGAAATGC  
GCATTGCGCGGAAAAACTGGGCGATGCGGCGAAACGCACCATTGAAGAAGGCGGGCG  
ATAGCTATTATAACCTGATTGAGCTGATTGATGAACTGAAAAGCCTGAAAAAAGCAA  
AGCGCTGGGCGAAAAAGCGGAT

## Reference

Xie, Z. X., Li, B. Z., Mitchell, L. A., Wu, Y., Qi, X., Jin, Z., Jia, B., Wang, X., Zeng, B. X., Liu, H. M., Wu, X. L., Feng, Q., Zhang, W. Z., Liu, W., Ding, M. Z., Li, X., Zhao, G. R., Qiao, J. J., Cheng, J. S., Zhao, M., Kuang, Z., Wang, X., Martin, J. A., Stracquadiano, G., Yang, K., Bai, X., Zhao, J., Hu, M. L., Lin, Q. H., Zhang, W. Q., Shen, M. H., Chen, S., Su, W., Wang, E. X., Guo, R., Zhai, F., Guo, X. J., Du, H. X., Zhu, J. Q., Song, T. Q., Dai, J. J., Li, F. F., Jiang, G. Z., Han, S. L., Liu, S. Y., Yu, Z. C., Yang, X. N., Chen, K., Hu, C., Li, D. S., Jia, N., Liu, Y., Wang, L. T., Wang, S., Wei, X. T., Fu, M. Q., Qu, L. M., Xin, S. Y., Liu, T., Tian, K. R., Li, X. N., Zhang, J. H., Song, L. X., Liu, J. G., Lv, J. F., Xu, H., Tao, R., Wang, Y., Zhang, T. T., Deng, Y. X., Wang, Y. R., Li, T., Ye, G. X., Xu, X. R., Xia, Z. B., Zhang, W., Yang, S. L., Liu, Y. L., Ding, W. Q., Liu, Z. N., Zhu, J. Q., Liu, N. Z., Walker, R., Luo, Y., Wang, Y., Shen, Y., Yang, H., Cai, Y., Ma, P. S., Zhang, C. T., Bader, J. S., Boeke, J. D., Yuan, Y. J., 2017. "Perfect" designer chromosome V and behavior of a ring derivative. *Science*. 355, 4704-4710.
